# Supplementary material
Source: PubMed Central journal article supplement (PMC8324289)
Supplement: 0901.pdf [file 0901.pdf]

**Supplementary Fig. 1** Variable importance plot was used to determine which variables make a significant contribution on RF analysis. Thirteen variables were sorted from top to bottom, from the most important to the least important. Variable importance was measured by the mean decrease in accuracy.

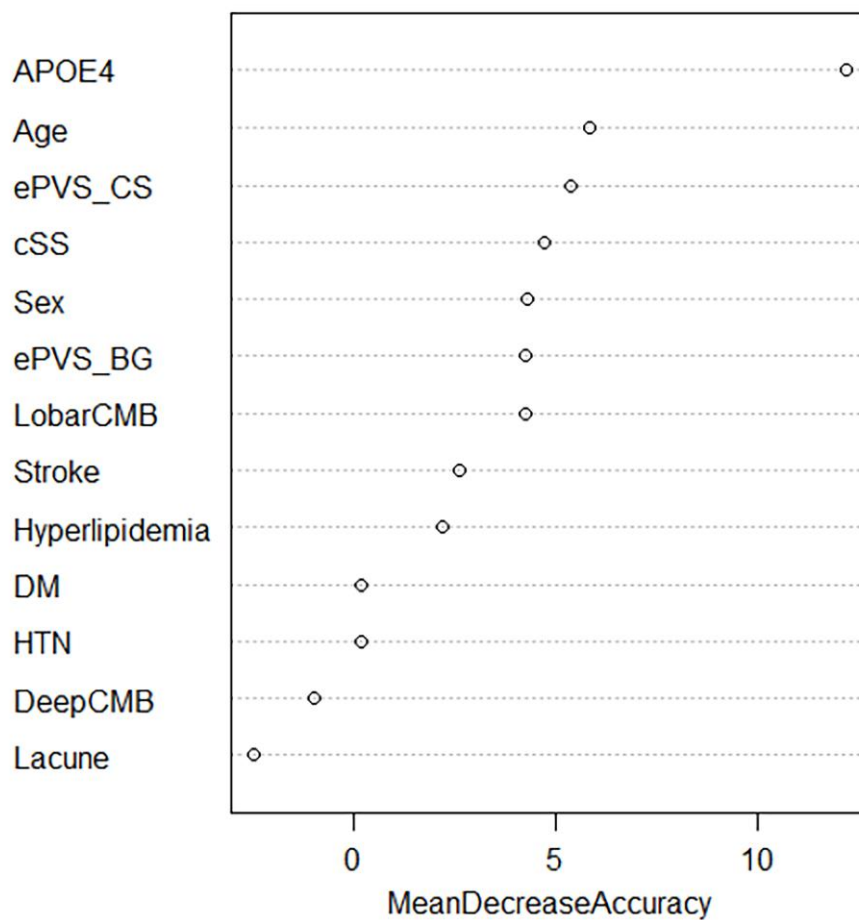

Supplementary Table 1. Comparisons between high and low degree of MRI-visible PVS in the centrum semiovale groups within  $\beta$ -amyloid positive patients

|                                   | Low degree of PVS-CS | High degree of PVS-CS | P value |
|-----------------------------------|----------------------|-----------------------|---------|
| n (%)                             | 29 (37.7%)           | 48 (62.3%)            |         |
| Age, years, mean (SD)             | 73.3 (7.8)           | 76.6 (7.3)            | 0.069   |
| Sex, female, n (%)                | 20 (69.0%)           | 24 (50.0%)            | 0.103   |
| Hypertension, n (%)               | 13 (44.8%)           | 23 (47.9%)            | 0.792   |
| Diabetes mellitus, n (%)          | 5 (17.2%)            | 11 (22.9%)            | 0.552   |
| Hyperlipidemia, n (%)             | 2 (6.9%)             | 9 (18.8%)             | 0.192   |
| Prior stroke, n (%)               | 1 (3.4%)             | 3 (6.3%)              | 1.000   |
| APOE $\epsilon$ 4 presence, n (%) | 13 (44.8%)           | 20 (41.7%)            | 0.974   |
| AD, n (%)                         | 15 (51.7%)           | 32 (66.7%)            | 0.193   |
| MMSE, median (IQR)                | 25.0 (21.0-26.5)     | 22.5 (19.0-25.0)      | 0.071   |
| Lacunae, median (IQR)             | 0 (0-0)              | 0 (0-0.8)             | 0.495   |
| cSS presence, n (%)               | 2 (6.9%)             | 4 (8.3%)              | 1.000   |
| LobarCMB, median (IQR)            | 0 (0-0)              | 0 (0-2)               | 0.014   |
| DeepCMB, median (IQR)             | 0 (0-0)              | 0 (0-0)               | 0.792   |
| WMH presence, n (%)               | 13 (44.8%)           | 34 (70.8%)            | 0.023   |

SD = standard deviation, IQR = interquartile range, APOE = apolipoprotein E; PVS-CS= MRI-visible perivascular space in centrum semi-ovale; AD = Alzheimer's disease; MMSE = mini-mental state examination; CMB = cerebral microbleed; cSS = cortical superficial siderosis; WMH = white matter hyperintensities

Supplementary Table 2. Comparisons between high and low degree of MRI-visible PVS in the centrum semiovale groups within  $\beta$ -amyloid negative patients

|                                   | Low degree of PVS-CS | High degree of PVS-CS | P value |
|-----------------------------------|----------------------|-----------------------|---------|
| n (%)                             | 43 (64.2%)           | 24 (35.8%)            |         |
| Age, years, mean (SD)             | 68.3 (10.0)          | 76.5 (9.8)            | 0.002   |
| Sex, female, n (%)                | 30 (69.8%)           | 14 (59.3%)            | 0.345   |
| Hypertension, n (%)               | 12 (27.9%)           | 13 (54.2%)            | 0.033   |
| Diabetes mellitus, n (%)          | 6 (14.0%)            | 4 (16.7%)             | 0.737   |
| Hyperlipidemia, n (%)             | 6 (14.0%)            | 3 (12.5%)             | 1.000   |
| Prior stroke, n (%)               | 3 (7.0%)             | 4 (16.7%)             | 0.239   |
| APOE $\epsilon$ 4 presence, n (%) | 9 (22.0%)            | 4 (18.2%)             | 1.000   |
| AD, n (%)                         | 8 (18.6%)            | 11 (45.8%)            | 0.018   |
| MMSE, median (IQR)                | 27.0 (24.0-29.0)     | 24.5 (21.3-27.5)      | 0.018   |
| Lacunes, median (IQR)             | 0 (0-0)              | 0 (0-0.8)             | 0.431   |
| cSS presence, n (%)               | 0 (0%)               | 1 (4.2%)              | 0.358   |
| LobarCMB, median (IQR)            | 0 (0-0)              | 0 (0-1)               | 0.007   |
| DeepCMB, median (IQR)             | 0 (0-0)              | 0 (0-0.8)             | 0.507   |
| WMH presence, n (%)               | 13 (30.2%)           | 14 (58.3%)            | 0.025   |

SD = standard deviation, IQR = interquartile range, APOE = apolipoprotein E; PVS-CS= MRI-visible perivascular space in centrum semi-ovale; AD = Alzheimer's disease; MMSE = mini-mental state examination; CMB = cerebral microbleed; cSS = cortical superficial siderosis; WMH = white matter hyperintensities
